# Supplementary material for: Separation of particles by pulsed dielectrophoresis
Source: Royal Society of Chemistry journal article supplement (doi:10.1039/b906202e), 2009-01-01
Supplement: b906202e.pdf [file b906202e.pdf]

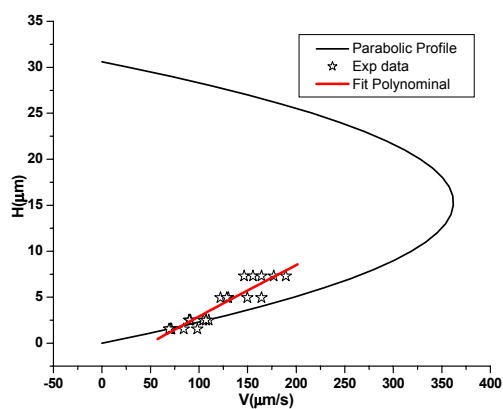

**Fig.1** The component of velocities of particles moving along slanted IDEs system. The results show lower velocities for 5, 10 and 15  $\mu\text{m}$  beads and a higher velocity for 3  $\mu\text{m}$  bead. The resulting coefficients are obtained to revise Stokes formula accordingly.

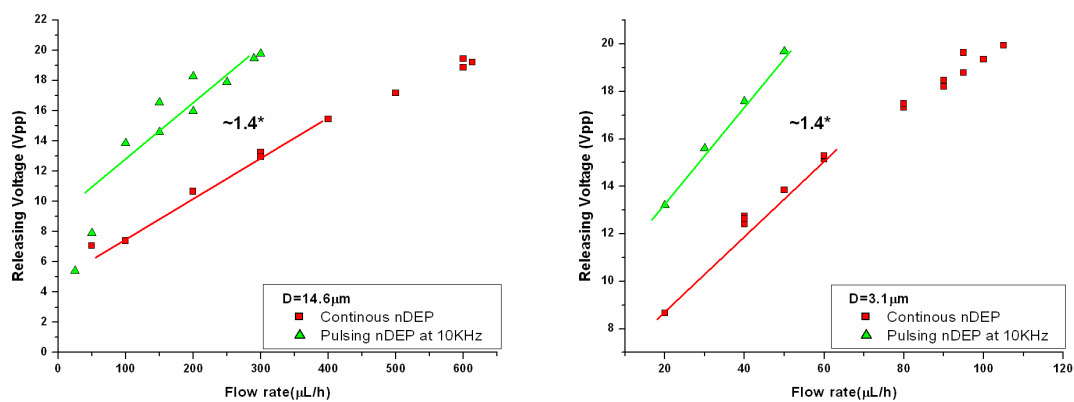

**Fig.2** The comparison of continuous nDEP and pulsed nDEP with 10 KHz modulation frequency for 15  $\mu\text{m}$  (left) and 3  $\mu\text{m}$  (right) beads. Time-average strength of pulsed nDEP is about 1.4X lower than continuous nDEP.
